# Supplementary material
Source: PubMed Central journal article supplement (PMC4158667)

# sSVD MTT

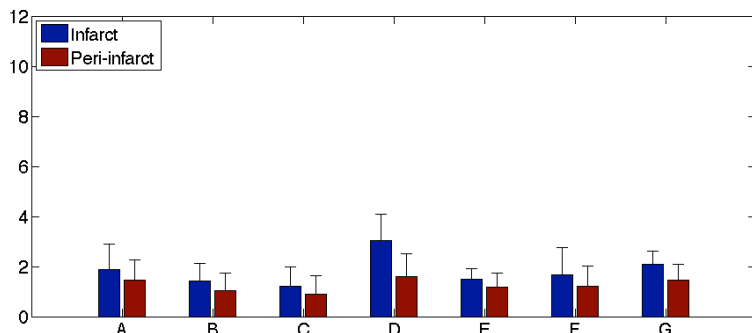

# oSVD MTT

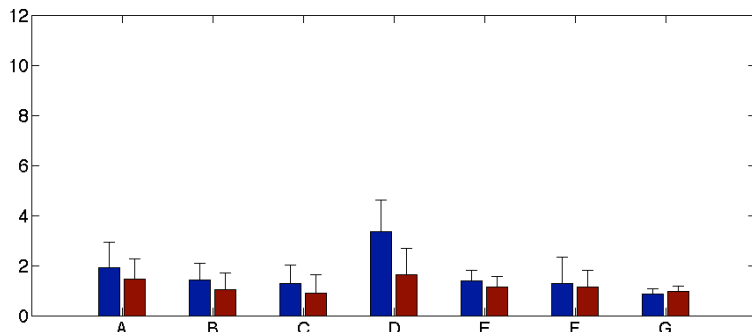

# Parametric MTT

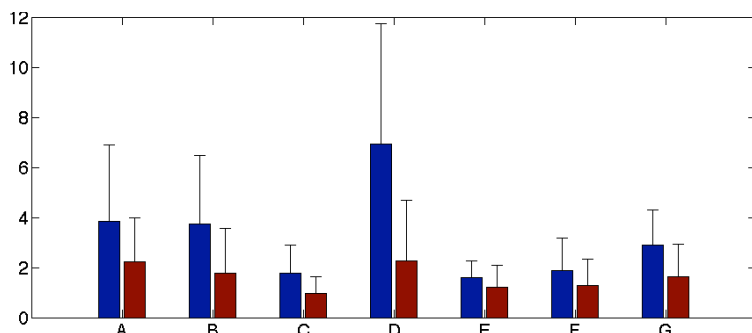

# OEFmax

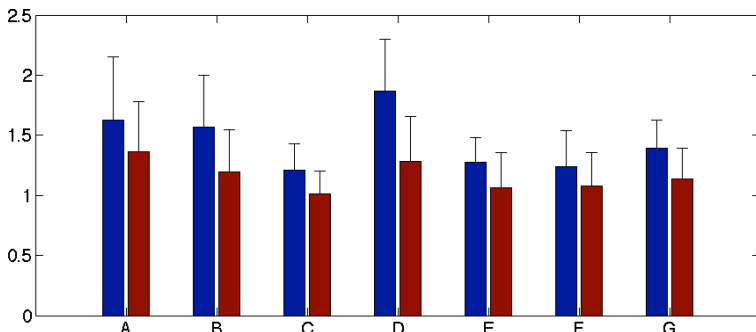

# CTH

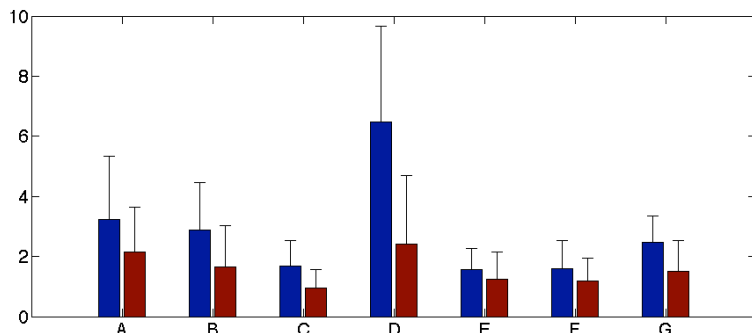

# CoV

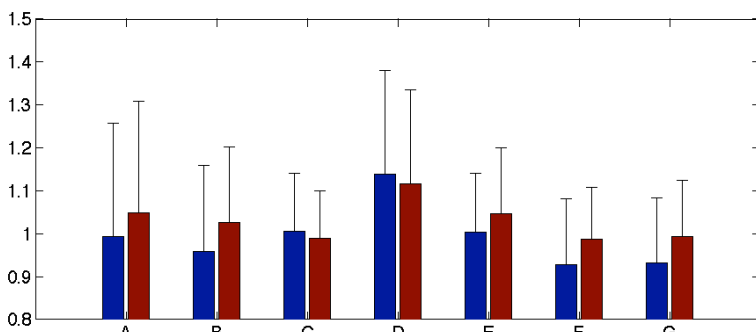

Supplement: jcbfm2014111x1.pdf [file jcbfm2014111x1.pdf]
